# Supplementary figures and images for: Frequency-dependent mobilization of heterogeneous pools of synaptic vesicles shapes presynaptic plasticity
Source: eLife journal article supplement (doi:10.7554/elife.28935), 2017-10-09

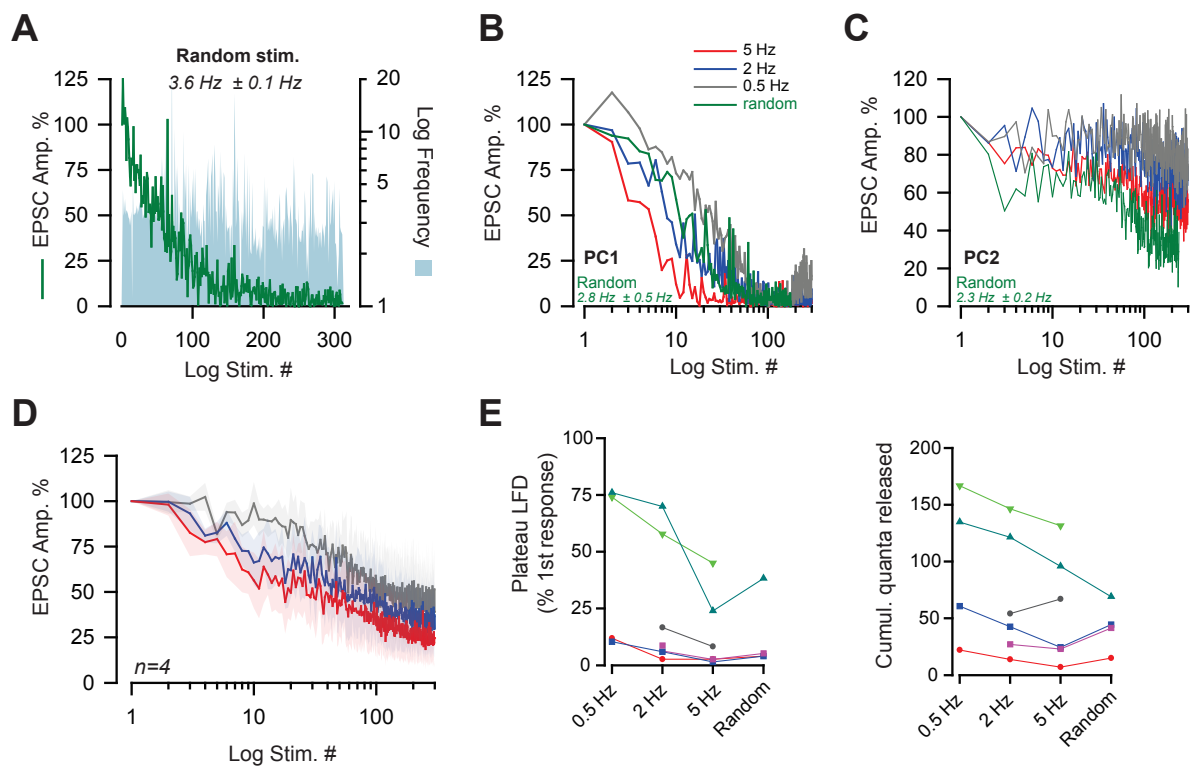

**Doussau et al.**  
**Figure 1-figure supplement 1**

Supplement: supp [file elife_poa_e28935_Figure_1_figure_supplement_1.pdf › elife_poa_e28935_Figure_1_figure_supplement_1.pdf]

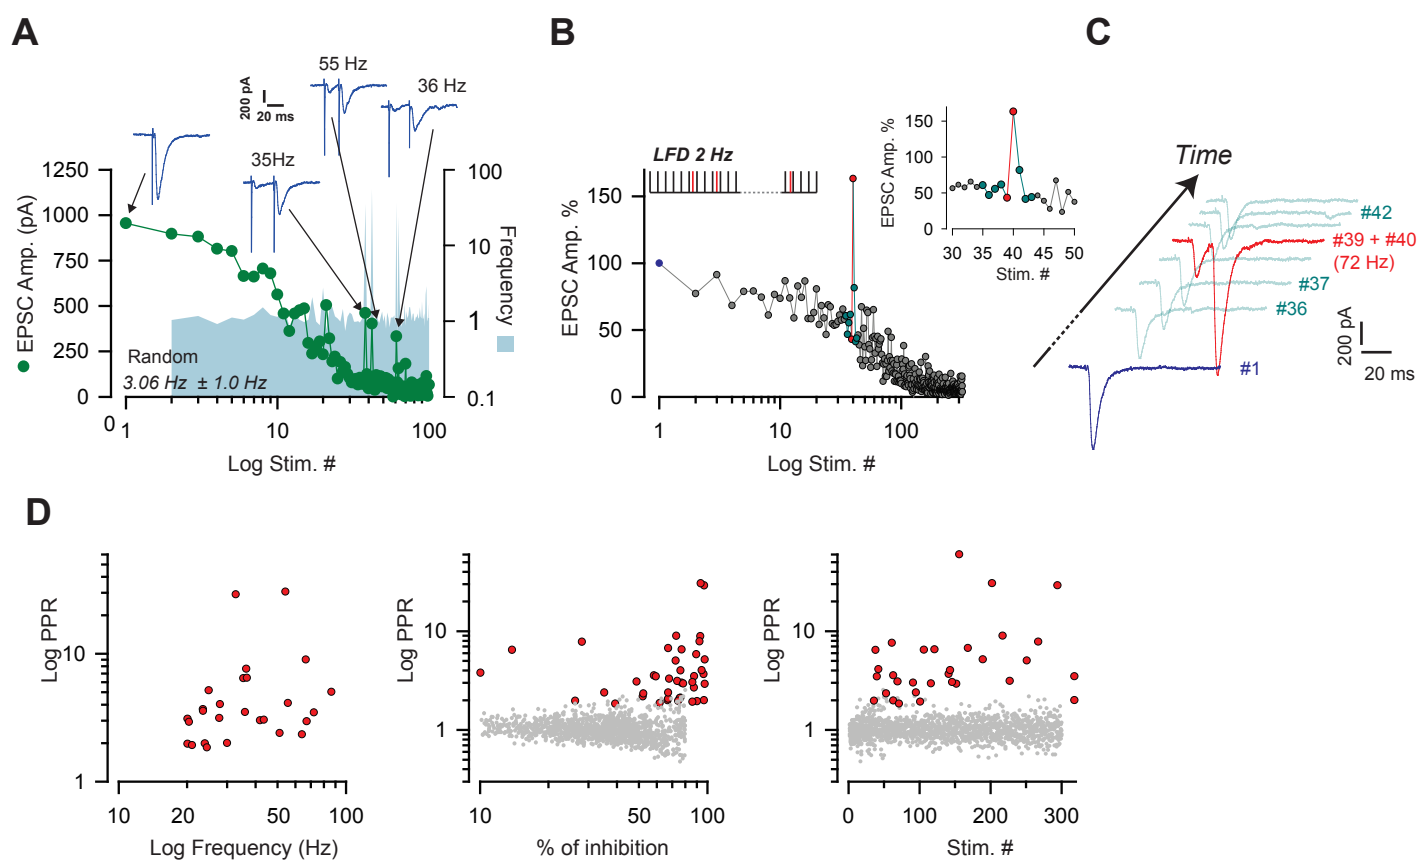

**Doussau et al.**  
**Figure 4-figure supplement 1**

Supplement: supp [file elife_poa_e28935_Figure_4_figure_supplement_1.pdf › elife_poa_e28935_Figure_4_figure_supplement_1.pdf]
